# Supplementary material for: Conceptual Demography in Upper Secondary Chemistry and Biology Textbooks’ Descriptions of Protein Synthesis: A Matter of Context?
Source: Atypon-hosted journal article supplement (doi:10.1187/cbe.17-12-0274), 2018-09-01
Supplement: combinedsupmats.pdf [file combinedsupmats.pdf]

# Supplemental Material

*CBE—Life Sciences Education*

Wahlberg and Gericke

**SUPPLEMENTAL MATERIAL TABLE 1:** the absolute frequency of the sample words in each textbook

| Sample Term | C) Andersson et al. (2013) | C) Borén et al. (2012) | C) Henriksson (2012b) | B) Björndahl et al. (2011) | B) Brynhildsen et al. (2011) | B) Henriksson (2012a) | B) Karlsson et al. (2011) | Average (Chemistry) | Average (Biology) |
|-------------|----------------------------|------------------------|-----------------------|----------------------------|------------------------------|-----------------------|---------------------------|---------------------|-------------------|
| DNA         | 5                          | 22                     | 15                    | 11                         | 9                            | 17                    | 27                        | 14.0                | 16.0              |
| Gene        | 8                          | 13                     | 7                     | 6                          | 24                           | 6                     | 17                        | 9.3                 | 13.3              |
| mRNA        | 16                         | 13                     | 21                    | 13                         | 12                           | 21                    | 26                        | 16.7                | 18.0              |
| Exon        | 0                          | 3                      | 1                     | 1                          | 4                            | 1                     | 6                         | 1.3                 | 3.0               |
| Intron      | 0                          | 4                      | 3                     | 2                          | 4                            | 3                     | 8                         | 2.3                 | 4.3               |
| tRNA        | 33                         | 18                     | 8                     | 6                          | 5                            | 9                     | 15                        | 19.7                | 8.8               |
| Aminoacid   | 12                         | 26                     | 9                     | 13                         | 7                            | 8                     | 25                        | 15.7                | 13.3              |
| Peptide     | 6                          | 3                      | 2                     | 0                          | 0                            | 0                     | 0                         | 3.7                 | 0                 |
| Protein     | 8                          | 26                     | 12                    | 16                         | 17                           | 7                     | 30                        | 15.3                | 17.5              |

C) refers to a chemistry textbook and B) refers to a biology textbook.

**SUPPLEMENTAL MATERIAL TABLE 2:** The relationships between sample terms in the chemistry textbooks and biology textbooks respectively.

| Chemistry (%) | DNA | Gene | mRNA | Exon | Intron | tRNA | Aminoacid | Peptide | Protein |
|---------------|-----|------|------|------|--------|------|-----------|---------|---------|
| DNA           |     |      |      |      |        |      |           |         |         |
| Gene          | 5.8 |      |      |      |        |      |           |         |         |
| mRNA          | 5.1 | 4.3  |      |      |        |      |           |         |         |
| Exon          | 0   | 0    | 0.7  |      |        |      |           |         |         |
| Intron        | 0.7 | 0    | 1.4  | 1.4  |        |      |           |         |         |
| tRNA          | 1.4 | 0    | 8.7  | 0    | 0      |      |           |         |         |
| Aminoacid     | 2.2 | 0.7  | 5.8  | 0    | 0      | 18.8 |           |         |         |
| Peptide       | 0   | 0    | 1.4  | 0    | 0      | 5.1  | 3.6       |         |         |
| Protein       | 6.5 | 6.5  | 8.0  | 0.7  | 0      | 3.6  | 5.8       | 1.4     |         |

| Biology (%) | DNA  | Gene | mRNA | Exon | Intron | tRNA | Aminoacid | Peptide | Protein |
|-------------|------|------|------|------|--------|------|-----------|---------|---------|
| DNA         |      |      |      |      |        |      |           |         |         |
| Gene        | 11.4 |      |      |      |        |      |           |         |         |
| mRNA        | 8.0  | 2.8  |      |      |        |      |           |         |         |
| Exon        | 0.6  | 1.1  | 2.3  |      |        |      |           |         |         |
| Intron      | 1.7  | 1.1  | 1.1  | 2.3  |        |      |           |         |         |
| tRNA        | 0    | 0    | 4.5  | 0    | 0      |      |           |         |         |
| Aminoacid   | 1.1  | 1.1  | 8.0  | 0    | 0      | 11.9 |           |         |         |
| Peptide     | 0    | 0    | 0    | 0    | 0      | 0    | 0         |         |         |
| Protein     | 8.5  | 9.7  | 9.1  | 2.3  | 2.8    | 0.6  | 8.0       | 0       |         |

The numbers are presented as percent of the total number of relationships found between the sample terms.
